# Supplementary material for: Augmented reality and mixed reality for healthcare education beyond surgery: an integrative review
Source: PubMed Central journal article supplement (PMC7246121; doi:10.5116/ijme.5e01.eb1a), 2020-01-18
Supplement: ijme-11-1-S1.pdf [file ijme-11-1-S1.pdf]

**Appendix 1.**

Study characteristics including quality scores

| Study of a Quantitative Method | Study Aim (Subjects of Healthcare Education)                                                                                                                  | Design (Participants)                                                                                                                                               | Outcome Measures                                                                                                                                        | Summary of Results                                                                                                                                                                                                                                                        | Application/ Technologies (Training time)                                                                                                                                                                                | Display System | MERSQI Score (18) | Overall Rating (7) |
|--------------------------------|---------------------------------------------------------------------------------------------------------------------------------------------------------------|---------------------------------------------------------------------------------------------------------------------------------------------------------------------|---------------------------------------------------------------------------------------------------------------------------------------------------------|---------------------------------------------------------------------------------------------------------------------------------------------------------------------------------------------------------------------------------------------------------------------------|--------------------------------------------------------------------------------------------------------------------------------------------------------------------------------------------------------------------------|----------------|-------------------|--------------------|
| Abhari et al. (2015)           | Evaluation of an HMD-based guidance system compared with three planning environments<br><br>(Resection planning of brain tumour from images and head phantom) | Single-group posttest (Study 1 and 2) (10 novices/non-clinicians)<br><br>Two-group non-randomized comparison (Study 3) (7 clinicians and 14 novices/non-clinicians) | Test:<br>1) Difference in points of entry<br>2) Deviation between angles of surgical path<br>3) Accuracy<br>4) Response time<br>5) Index of performance | AR/MR significantly improved non-clinicians' performance ( $p < .01$ ) compared to conventional planning environments (Study 1 and 2)<br>AR/MR guidance significantly reduced the time of the task performed by clinicians ( $p < .05$ ) (Study 3)                        | Self-developed for HMD with tracker recognizing physical and virtual representations of a head phantom.<br>Connected with a foot pedal to interact with the system and to toggle between AR and MR<br><br>(Not reported) | AR/MR          | 11.5              | 4                  |
| Aebersold et al. (2018)        | Preliminary evaluation of a procedure training application<br><br>(Simulating nasogastric tube (NGT) insertion on phantom)                                    | Mixed methods study: Randomized controlled trial (RCT) and survey<br><br>(69 nursing students, Control=34; AR=35)                                                   | Test:<br>1) Self-developed checklist for performance<br>Questionnaire:<br>2) Likert scale on LE                                                         | Statistically significant correct placement of NGT through all checklist items in the AR group vs. control ( $p < .011$ ).<br>Participants' agreed/strongly agreed that AR was better for visualization ( $p < .01$ ) and useful as tool in skill training ( $p < .015$ ) | Company-developed application for mobile devices<br><br>(20-25 minutes)                                                                                                                                                  | AR             | 15.5              | 5                  |

|                                                                          |                                                                                                                                                    |                                                                                                                    |                                                                                                                                                                                                                                                                                     |                                                                                                                                                                                                                                                                                                                                                                    |                                                                                                                                   |           |             |          |
|--------------------------------------------------------------------------|----------------------------------------------------------------------------------------------------------------------------------------------------|--------------------------------------------------------------------------------------------------------------------|-------------------------------------------------------------------------------------------------------------------------------------------------------------------------------------------------------------------------------------------------------------------------------------|--------------------------------------------------------------------------------------------------------------------------------------------------------------------------------------------------------------------------------------------------------------------------------------------------------------------------------------------------------------------|-----------------------------------------------------------------------------------------------------------------------------------|-----------|-------------|----------|
| <p>Albrecht, Folta-Schoofs, Behrends, &amp; Von Jan (2013)</p>           | <p>Comparative study of an application<br/><br/>(Learning of gunshot wounds)</p>                                                                   | <p>Mixed methods study: RCT (pretest and post-test) and survey<br/><br/>(10 medical students, Control=4; AR=6)</p> | <p>Test (pre- and post-completion):<br/>1) Self-developed single choice (improvement)<br/>Questionnaire:<br/>2) AttrakDiff2 (Likert scale) on LE<br/>3) POMS on Mood States (pre- and post-completion)<br/>Observation (by non-participants):<br/>Directly on learning behavior</p> | <p>The test score was significantly improved in AR group (<math>p &lt; .03</math>)<br/>Hedonic quality was significantly favored by AR group (<math>p &lt; .005</math>).<br/>Fatigue and numbness significantly decreased, and vigor rose in the AR group.<br/>Observations showed interactive discussion in AR group vs. individual approach in control group</p> | <p>Self-developed application for mobile devices recognizing markers overlaying images onto user's body<br/><br/>(30 minutes)</p> | <p>AR</p> | <p>14.5</p> | <p>4</p> |
| <p>Bifulco et al. (2014)</p>                                             | <p>Investigation of the feasibility of an HMD-based application<br/><br/>(Recording an electrocardiogram (ECG) on phantom and healthy patient)</p> | <p>Two-group non-randomized comparison<br/><br/>(20 non-clinicians, manikin=10; patient=10)</p>                    | <p>Test:<br/>1) Accuracy (average errors in mm)<br/>2) Displacement errors (max error)</p>                                                                                                                                                                                          | <p>Average positioning errors of precordial electrodes were better on phantom vs. healthy patient. Max errors for the V6-lead <math>&lt; 16</math> mm in both tests did not exceed clinical threshold of 25 mm</p>                                                                                                                                                 | <p>Self-developed for HMD with webcam recognizing markers attached to ECG device and phantom-patient<br/><br/>(Few minutes)</p>   | <p>AR</p> | <p>10.5</p> | <p>3</p> |
| <p>Ferrer-Torregrosa, Torralba, Jimenez, Garcia, &amp; Barcia (2015)</p> | <p>Comparison of an application<br/><br/>(Learning anatomy of the lower limb)</p>                                                                  | <p>Mixed methods study: RCT and survey<br/><br/>(211 students of anatomy, Control=134; AR=77)</p>                  | <p>Test:<br/>1) Self-developed multiple choice<br/>Questionnaire:<br/>2) Self-developed on LE (metacognitive perception)</p>                                                                                                                                                        | <p>The AR group achieved significant better test result (<math>p = .0001</math>), and significantly surpassed the control group in terms of metacognitive perception (<math>p &lt; .05</math>)</p>                                                                                                                                                                 | <p>Self-developed for computer with webcam recognizing markers in printed book<br/><br/>(Not reported)</p>                        | <p>AR</p> | <p>15.5</p> | <p>4</p> |

|                                 |                                                                                                              |                                                                                                                       |                                                                                                                                                   |                                                                                                                                                                                                                                                              |                                                                                                                                                             |    |      |   |
|---------------------------------|--------------------------------------------------------------------------------------------------------------|-----------------------------------------------------------------------------------------------------------------------|---------------------------------------------------------------------------------------------------------------------------------------------------|--------------------------------------------------------------------------------------------------------------------------------------------------------------------------------------------------------------------------------------------------------------|-------------------------------------------------------------------------------------------------------------------------------------------------------------|----|------|---|
| Ferrer-Torregrosa et al. (2016) | Comparison of a didactic aid based on AR with images and video<br><br>(Learning anatomy of the foot muscles) | Mixed methods study: Three-group RCT and survey<br><br>(171 students of anatomy, images/ Control=60; Video=51; AR=60) | Test:<br>1) Self-developed Questionnaire:<br>2) Self-developed on LE (metacognitive perception)<br>3) Follow-up interview on learning success     | Significant higher test score was obtained with aid of AR compared with video and notes ( $p<.000$ ). The metacognitive perception was significantly favored by the AR group ( $p<.05$ ), also sharing higher expectations for AR-based learning success.    | Company-developed for mobile devices recognizing markers in printed book<br><br>(14 days)                                                                   | AR | 13.5 | 4 |
| Huang et al. (2018)             | Investigation of the feasibility of an HMD-based application<br><br>(Simulating US-guided CVC on phantom)    | Mixed methods study: Prospective RCT and survey<br><br>(32 novice operators, Control=16; AR=16)                       | Test:<br>1) Cannulation time<br>2) Procedure time<br>3) Adherence level<br>Questionnaire:<br>4) Expert-developed on LE (usability and ergonomics) | No significant difference in cannulation time ( $p=.09$ ) or procedure time ( $p=.29$ ) for the AR group vs. Control. Adherence level were significantly favored by the AR group ( $p=.003$ ). The majority >80% accepted the device in terms of ergonomics. | Self-developed for HMD rendering an instructional slide show connected to a computer and a foot pedal to navigate between the content<br><br>(5-10 minutes) | AR | 13.5 | 5 |
| Jeon, Choi, & Kim (2014)        | Investigation of a novel visualization device<br><br>(Simulating US-guided CVC on phantom)                   | Prospective cross-over trial<br><br>(20 physicians, Control/AR=20)                                                    | Test:<br>1) Time<br>2) No. needle redirections                                                                                                    | Median of procedure time was clinically significant reduced by 50% in AR group vs. Control ( $p<.001$ ). The number of needle-redirections significantly decreased in the AR group ( $p<.001$ )                                                              | Self-developed for micro projector attached to an ultrasound probe projecting images directly onto phantom<br><br>(10 minutes)                              | AR | 11.5 | 2 |

|                                 |                                                                                                           |                                                                                                        |                                                                                                                                        |                                                                                                                                                                                                                                                                           |                                                                                                                                                                               |    |      |   |
|---------------------------------|-----------------------------------------------------------------------------------------------------------|--------------------------------------------------------------------------------------------------------|----------------------------------------------------------------------------------------------------------------------------------------|---------------------------------------------------------------------------------------------------------------------------------------------------------------------------------------------------------------------------------------------------------------------------|-------------------------------------------------------------------------------------------------------------------------------------------------------------------------------|----|------|---|
| Keri et al. (2015)              | Evaluation of a needle guidance system<br><br>(Simulating lumbar puncture on phantom with abnormal spine) | RCT<br><br>(24 residents, Control=12; MR=12)                                                           | Test (without assistive MR):<br>1) Needle path<br>2) Tissue damage<br>3) Procedure time<br>4) Needle insertion time<br>5) Success rate | Residents trained with MR visualization had better performance metrics: The MR group outperformed the control group significantly for needle path (p=.02), tissue damage (p=.01) and needle insertion time (p=.05) but not procedure time (p=.06) or success rate (p=.99) | Company-developed for computer, ultrasound machine, and tracker sensor-recognizing a virtual model of a vertebral column registered to a physical phantom<br><br>(20 minutes) | MR | 12.5 | 5 |
| Kugelmann et al. (2018)         | Evaluation of the feasibility of a tutorial<br><br>(Learning of human gross anatomy)                      | Prospective large-scale cross-over survey<br><br>(880 medical students, Control/AR=880 /748 in survey) | Questionnaire:<br>1) Likert scale on LE<br>2) Advantages and disadvantages<br>3) 4-item rating of the tutorial                         | The students agreed that the system increased the motivation 59% and greatly improved 3D understanding 93.4% (strongly agreed). AR was found advantageous to traditional books and rated 'good' by 81.9%                                                                  | Company-developed for a computer connected to two cameras recognizing sensor-landmarks and overlaying images onto user's body<br><br>(Before/during the tutorial)             | AR | 7    | 2 |
| Küçük, Kapakin, & Gökteş (2016) | Determination of learning effect via mobile AR<br><br>(Learning of neuroanatomical pathways)              | Mixed methods study: RCT and survey<br><br>(70 medical students, Control=36; AR=34)                    | Test:<br>1) Self-developed multiple choice<br>2) Self-translated Cognitive Load (Likert) Scale<br>Questionnaire:<br>3) Interview on LE | Achievement was significantly higher (p<.05) and cognitive load significantly lower reported in AR group (p<.05). Of students in AR group 79% responded that mobile AR facilitated learning the subject                                                                   | Company-developed for mobile devices recognizing markers in printed book<br><br>(5 hour-course)                                                                               | AR | 14.5 | 5 |

|                                             |                                                                                                                                          |                                                                                                                               |                                                                                                                                                  |                                                                                                                                                                                                                                                         |                                                                                                                                                       |    |      |   |
|---------------------------------------------|------------------------------------------------------------------------------------------------------------------------------------------|-------------------------------------------------------------------------------------------------------------------------------|--------------------------------------------------------------------------------------------------------------------------------------------------|---------------------------------------------------------------------------------------------------------------------------------------------------------------------------------------------------------------------------------------------------------|-------------------------------------------------------------------------------------------------------------------------------------------------------|----|------|---|
| Leitritz et al. (2014)                      | Evaluation of the usability of an HMD-based application for examination<br><br>(Training ophthalmoscopy on head phantom and test person) | Mixed methods study: RCT and survey<br><br>(37 medical students, Control=18; AR=19)                                           | Test:<br>1) Accuracy (No. of sketched vessels)<br>2) Self-developed (OTS) score<br>Questionnaire:<br>3) Likert scale on LE (self-evaluation)     | Significantly higher accuracy ( $p<.0083$ ) and OTS vs. Control ( $p<.0033$ ), but self-evaluation was not significantly different between the two groups                                                                                               | Company-developed for HMD connected to computer recognizing a model lens and a head phantom<br><br>(15 minutes)                                       | AR | 14.5 | 4 |
| Ma et al. (2016)                            | Investigation of precision of a personalized system<br><br>(Learning of human gross anatomy)                                             | Two single-group post-tests and survey (Study 1)<br>(2 surgeons and 5 medical students)<br>(Study 2)<br>(72 medical students) | Test (quantified by participants):<br>1) Accuracy (Study 1)<br>Questionnaire:<br>2) Likert scale on usability<br>3) Likert scale on LE (Study 2) | Accuracy was demonstrated, and study participants favored the usability. The learning potential of AR was accepted by 86.1%, and found valuable as a display system of anatomy 91.7%                                                                    | Company-developed for computer connected to two cameras recognizing sensor-landmarks and overlaying images onto user's body<br><br>(15 minutes)       | AR | 7.5  | 2 |
| Mewes et al. (2019)                         | Provision and evaluation of a needle guidance system<br><br>(Simulating MR-guided needle insertion into calibration phantom)             | Single-group posttest and survey<br><br>(4 radiologists and 4 technicians)                                                    | Test:<br>1) Entry point error<br>2) Target point error<br>3) Insertion time<br>Questionnaire:<br>Expert-interview on LE (usability)              | The targets were reached, and the answers of the users were predominantly positive supporting the suitability of the system                                                                                                                             | Self-developed for projector coupled to two cameras inside a wide-bore MRI scanner recognizing markers on phantom<br><br>(Until users felt confident) | AR | 10.5 | 3 |
| Moro, Štromberga, Raikos, & Stirling (2017) | Comparison of an AR module with two learning modes (virtual reality (VR) and tablet)<br><br>(Learning of skull anatomy)                  | Mixed methods study: Three-group RCT and survey<br><br>(59 health science students, tablet/Control=22; VR=20; AR=17)          | Test:<br>1) Self-developed multiple choice<br>Questionnaire:<br>2) Scale on adverse health effects<br>3) Likert scale on LE                      | No significant difference in test scores between the three learning modes ( $p<.874$ ). Adverse effects as dizziness were significantly experienced in the VR group vs. AR and tablet group ( $p<.001$ ). Perception of AR was high but not significant | Self-developed for mobile devices<br><br>(10 minutes)                                                                                                 | AR | 13.5 | 5 |

|                                                  |                                                                                                                        |                                                                                                                                 |                                                                                                                                                                                                                                                        |                                                                                                                                                                                                                                                  |                                                                                                                                                                                |    |      |   |
|--------------------------------------------------|------------------------------------------------------------------------------------------------------------------------|---------------------------------------------------------------------------------------------------------------------------------|--------------------------------------------------------------------------------------------------------------------------------------------------------------------------------------------------------------------------------------------------------|--------------------------------------------------------------------------------------------------------------------------------------------------------------------------------------------------------------------------------------------------|--------------------------------------------------------------------------------------------------------------------------------------------------------------------------------|----|------|---|
| Moult et al. (2013)                              | Evaluation of a needle guidance system<br><br>(Simulating diagnostic US-guided facet joint injections on phantom)      | RCT<br><br>(26 pre-medical undergraduate students, Control=13; MR=13)                                                           | Test (without assistive technology):<br><br>1) Success rate<br>2) Total time<br>3) Time inside<br>4) Total path<br>5) Path inside                                                                                                                      | Significantly higher mean success rate of 61.5% in MR group vs. Control 38.5% (p=.031). No significant difference was found in any of the needle metrics of procedure times or path lengths                                                      | Company-developed for computer, ultrasound machine, and tracker sensor-recognizing a virtual model of a vertebral column registered to a physical phantom.<br><br>(10 minutes) | MR | 13.5 | 4 |
| Noll, Von Jan, Raap, Albrecht, & Albrecht (2017) | Comparison of an AR application with mobile blended learning environment<br><br>(Diagnosing various skin diseases)     | Mixed methods study: RCT (pretest, posttest, follow-up) and survey<br><br>(44 medical students, mobile phone/Control=22; AR=22) | Test (pre-, post- and follow-up-completion):<br><br>1) Self-developed single choice (improvement)<br>2) Retention (average decrease of correct answers)<br>Questionnaire:<br>3) AttrakDiff2 on LE<br>4) POMS on Mood States (pre- and post-completion) | No significant difference in test score or retention of knowledge.<br><br>No significant variations were found regarding experience and emotions between the groups of AR and mobile blended learning                                            | Self-developed application for mobile devices recognizing markers overlaying images onto user's body<br><br>(45 minutes)                                                       | AR | 14.5 | 6 |
| Rai, Rai, Mavrikakis, & Lam (2017)               | Validation and assessment of the efficacy of an HMD-based application<br><br>(Training ophthalmoscopy on head phantom) | Prospective three-group RCT<br><br>(28 novice residents and 3 fellows (experts), Control=15; AR=13; No training=3 (experts))    | Test:<br><br>1) Total time<br>2) Total score<br>3) Performance (task scores/time)                                                                                                                                                                      | Time required was not significantly different (p=.11), but the AR group significantly demonstrated superiority in total score (p=.02) and performance (p=.006). Fellows outperformed novice residents despite no prior experience with simulator | Company-developed for HMD connected to computer recognizing a model lens and a head phantom<br><br>(About 2 hours)                                                             | AR | 14.5 | 5 |
| Robinson et al. (2014)                           | Evaluation of a new MR part-task trainer                                                                               | Mixed methods study: Three-group non-randomized comparison and survey                                                           | Test (pre- and post-intervention without assistive technology):<br><br>1) SCVA score                                                                                                                                                                   | All participants significantly improved SCVA score (p<.0001) and time (p<.0001). The participants                                                                                                                                                | Self-developed for computer with tracker sensor-recognizing a virtual model of the phantom registered within a                                                                 | MR | 13.5 | 7 |

|                                |                                                                                                                                              |                                                                                                                                                                 |                                                                                                                                                                                                                                                                         |                                                                                                                                                                                                                                                                                                                                     |                                                                                                                                   |    |      |   |
|--------------------------------|----------------------------------------------------------------------------------------------------------------------------------------------|-----------------------------------------------------------------------------------------------------------------------------------------------------------------|-------------------------------------------------------------------------------------------------------------------------------------------------------------------------------------------------------------------------------------------------------------------------|-------------------------------------------------------------------------------------------------------------------------------------------------------------------------------------------------------------------------------------------------------------------------------------------------------------------------------------|-----------------------------------------------------------------------------------------------------------------------------------|----|------|---|
|                                | (Simulating subclavian venous access (SCVA/CVC) without US-guidance on phantom)                                                              | (65 physicians of different training categories, novices=25; intermediates=24; experts=16)                                                                      | 2) Time<br>3) No. attempts<br>4) No. skin punctures<br>5) Success rate<br>6) Complication rates (pneumothorax and subclavian puncture)<br>Questionnaire:<br>5) Likert scale on LE (usability)<br>6) Likert scale on performance confidence (pre- and post-intervention) | significantly reduced no. attempts ( $p<.0001$ ), no. skin punctures ( $p=.0007$ ), but no significant difference was found though success rate was increased ( $p=.08$ ). Both complication rates fell with MR.<br>The majority 95.4% strongly agreed the usability for future CVC.<br>Confidence significantly rose ( $p<.0001$ ) | 3D-printed phantom built-up of head and thorax CT scan<br><br>(Until users felt confident)                                        |    |      |   |
| Rochlen, Levine, & Tait (2017) | Evaluation of usability of an HMD-based needle guidance system<br><br>(Simulating CVC without US-guidance on phantom)                        | Mixed methods study: Two-group non-randomized comparison and survey<br><br>(40 medical students /participants, No prior CVC training=13; prior CVC training=27) | Test:<br>1) Correct identification<br>2) Correct needle insertion (accuracy)<br>3) Time<br>Questionnaire:<br>4) Likert scale on LE<br>5) Open-ended evaluation (ergonomics)                                                                                             | No significant difference in identification, needle insertion, and time expense between experienced and non-experienced.<br>Participants favored AR in visualizing anatomy 92.5% and for incorporation into training 82.1%.<br>Evaluation addressed issues of poor ergonomics <44.4%                                                | Self-developed for HMD with external camera recognizing markers on needle and phantom<br><br>(Until users felt confident)         | AR | 14   | 3 |
| Siebert <i>et al.</i> (2017)   | Comparative investigation of adherence to a guideline adapted for HMD<br><br>(Simulating pediatric cardiopulmonary resuscitation on phantom) | Mixed methods study: Prospective RCT and survey<br><br>(20 residents, pocket reference cards/Control=10; AR=10)                                                 | Test (deviation from guidelines):<br>1) Time to first defibrillation/DF<br>2) Time to first compression<br>3) Drug and shock doses<br>4) No. of shocks<br>Questionnaire:<br>5) Likert scale on LE (stress perception)                                                   | Adherence by time to first DF and compressions were not improved, but errors were significantly reduced in administering shock doses vs. Control ( $p<.001$ ).<br>No significant difference in stress response ( $p=.38$ )                                                                                                          | Self-developed for HMD rendering guideline cards in the glasses with touchpad to navigate between the content<br><br>(15 minutes) | AR | 13.5 | 6 |

|                                                                    |                                                                                                                                                                                       |                                                                                                                                                 |                                                                                                                                                        |                                                                                                                                                                                                                                                                                                      |                                                                                                                                                                                                                                             |    |     |   |
|--------------------------------------------------------------------|---------------------------------------------------------------------------------------------------------------------------------------------------------------------------------------|-------------------------------------------------------------------------------------------------------------------------------------------------|--------------------------------------------------------------------------------------------------------------------------------------------------------|------------------------------------------------------------------------------------------------------------------------------------------------------------------------------------------------------------------------------------------------------------------------------------------------------|---------------------------------------------------------------------------------------------------------------------------------------------------------------------------------------------------------------------------------------------|----|-----|---|
| Solbiati <i>et al.</i> (2018)                                      | Preliminary assessment of a needle guidance system<br><br>(Simulation CT scan-guided needle insertion into phantom, porcine, and cadaver)                                             | Single group posttest (proof-of-concept study)<br><br>(Study participants not specified)                                                        | Test:<br>1) Computed accuracy (mm)                                                                                                                     | An acknowledged targeting accuracy was achieved in all cases but in the breathing porcine model                                                                                                                                                                                                      | Self-developed for mobile devices recognizing markers on tool and phantom-porcine-cadaver.<br><br>(Not reported)                                                                                                                            | AR | 8.5 | 2 |
| Sutherland, Hashtrudi-Zaad, Sellens, Abolmaesumi, & Mousavi (2013) | Demonstration of the potential and functionality of an application<br><br>(Simulating US-guided spinal needle insertion on phantom)                                                   | Two-group non-randomized comparative survey<br><br>(10 participants, residents=4; students and technicians=6)                                   | Test:<br>1) Force (traversing of tissue)<br>Questionnaire:<br>1) Likert scale on LE (functionality)                                                    | Peak values of the forces and the pattern of the profile corresponded to related work. The system was positively reviewed on the system regarding functionality, visual feedback, and haptic feedback                                                                                                | Self-developed for computer coupled to a haptic device with stylus and camera recognizing sensors attached to a dummy ultrasound probe and a phantom.<br><br>(5-10 minutes)                                                                 | AR | 9.5 | 2 |
| L. L. Wang, Wu, Bilici, & Tenney-Soeiro (2016)                     | Implementation and demonstration of a prototype<br><br>(Test preparation for neurologic clinical shelf exam)                                                                          | Single-group survey<br><br>(24 medical students)                                                                                                | Questionnaire:<br>1) Query of LE (utility)                                                                                                             | Upon demonstration 100% of participants agreed that AR improved the learning capacity for the textbook                                                                                                                                                                                               | Self-developed for mobile devices recognizing markers in printed book<br><br>(Demonstration)                                                                                                                                                | AR | 7   | 1 |
| Wang <i>et al.</i> (2017)                                          | Evaluation of feasibility and user experience of an HMD-based telemedicine mentoring platform<br><br>(Training US examination for trauma on healthy patient under guidance of mentor) | Three-group non-randomized comparison and survey<br><br>(24 medical students and 1 mentor, Full telemedicine setup/Control=12; AR=12; mentor=1) | Test:<br>1) Expert-Global Rating Scale for performance<br>2) Completion time<br>Questionnaire:<br>3) Likert scale on LE (utility)<br>4) Cognitive load | Performance of the AR group was not significantly improved ( $p=.534$ ), but the AR group had a significant prolonged completion time ( $p=.008$ ). The AR group showed no significant difference though they favored the utility of AR ( $p=.065$ ) and reported a lower cognitive load ( $p=.28$ ) | Self-developed for HMD with an ultrasound probe connected to computer and live-streamed to mentor connected to a sensor-controller projecting mentor's hands and gestures back into the AR space of the trainees<br><br>(No prior training) | AR | 12  | 7 |



|                              |                                                                                                                                                                         |                                                                                           |                                                                                                                |                                                                                                                                                                                                                                                 |                                                                         |    |                  |   |
|------------------------------|-------------------------------------------------------------------------------------------------------------------------------------------------------------------------|-------------------------------------------------------------------------------------------|----------------------------------------------------------------------------------------------------------------|-------------------------------------------------------------------------------------------------------------------------------------------------------------------------------------------------------------------------------------------------|-------------------------------------------------------------------------|----|------------------|---|
| Zhu, Fors, & Smedberg (2018) | Exploration of needs and challenges in applying AR in continuing professional development (CPD)<br><br>(Training of general practitioners within primary care in China) | Qualitative semi-structured face-to-face interviews<br><br>(13 physicians and 2 managers) | Questionnaire:<br><br>1) Interview on attitudes toward usage<br>2) Query of suitability for subjects in future | The participants reacted positively to usage of AR in CPD, especially concerning visualization and skill training.<br><br>The design should improve competencies, understand learning needs, and stimulate positive attitudes toward technology | Company-developed application for mobile devices<br><br>(Demonstration) | AR | 12 (AQRAME) (12) | 6 |
|------------------------------|-------------------------------------------------------------------------------------------------------------------------------------------------------------------------|-------------------------------------------------------------------------------------------|----------------------------------------------------------------------------------------------------------------|-------------------------------------------------------------------------------------------------------------------------------------------------------------------------------------------------------------------------------------------------|-------------------------------------------------------------------------|----|------------------|---|

KEY: HMD, head-mounted display; AR, augmented reality; MR, mixed reality; LE, learning experience; CVC, central venous catheterization; US, ultrasound
