# Supplementary material for: Augmented reality and mixed reality for healthcare education beyond surgery: an integrative review
Source: PubMed Central journal article supplement (PMC7246121; doi:10.5116/ijme.5e01.eb1a), 2020-01-18
Supplement: ijme-11-1-S2.pdf [file ijme-11-1-S2.pdf]

**Appendix 2.**

Distribution of studies across medical specialty or health science, number of studies, and participants enrolled according to number of studies

| Medical Specialty or Health Science | Subjects of Healthcare Education                 | No. Studies | No. Participants<br>(according to number of studies) |
|-------------------------------------|--------------------------------------------------|-------------|------------------------------------------------------|
| Anatomy<br>(6 studies)              | Foot Muscles                                     | 1           | 171                                                  |
|                                     | Lower Limb                                       | 1           | 211                                                  |
|                                     | Skull                                            | 1           | 59                                                   |
|                                     | Human Gross Anatomy                              | 2           | 880+72                                               |
|                                     | Neuroanatomical Pathways                         | 1           | 70                                                   |
| Anesthesia<br>(7 studies)           | Central Vein Catheterization                     | 4           | 32+20+65+40                                          |
|                                     | Lumbar Puncture                                  | 1           | 24                                                   |
|                                     | Spinal Needle Insertion                          | 1           | 10                                                   |
|                                     | Ultrasound Examination for Trauma (Telemedicine) | 1           | 24                                                   |
| Cardiology                          | Electrocardiogram Recording                      | 1           | 20                                                   |
| Dermatology                         | Skin Diseases                                    | 1           | 44                                                   |
| Family Medicine                     | Continuing Professional Development*             | 1           | 15                                                   |
| Forensic Medicine                   | Gunshot Wounds                                   | 1           | 10                                                   |
| Gastroenterology                    | Nasogastric Tube Insertion (Nursing)             | 1           | 69                                                   |
| Neurology                           | Shelf Exam Preparation                           | 1           | 24                                                   |
| Ophthalmology<br>(2 studies)        | Binocular Indirect Ophthalmoscopy                | 2           | 37+31                                                |
| Orthopedics                         | Facet Joint Injections                           | 1           | 26                                                   |
| Pediatrics                          | Cardiopulmonary Resuscitation                    | 1           | 20                                                   |
| Radiology<br>(3 studies)            | Resection Planning (Neurosurgery)                | 1           | 21                                                   |
|                                     | Needle Insertion (MRI)                           | 1           | 8                                                    |
|                                     | Needle Insertion (CT scan)                       | 1           | Not Specified                                        |

\*A theoretical application was devised from an anatomy application.<sup>47</sup>
